# Supplementary material for: Low-Flow Identification in Flood Frequency Analysis: A Case Study for Eastern Australia
Source: MDPI journal article supplement (doi:10.3390/w16040535), 2024-02-08
Supplement: s1 [file s1]

## Supplementary Materials

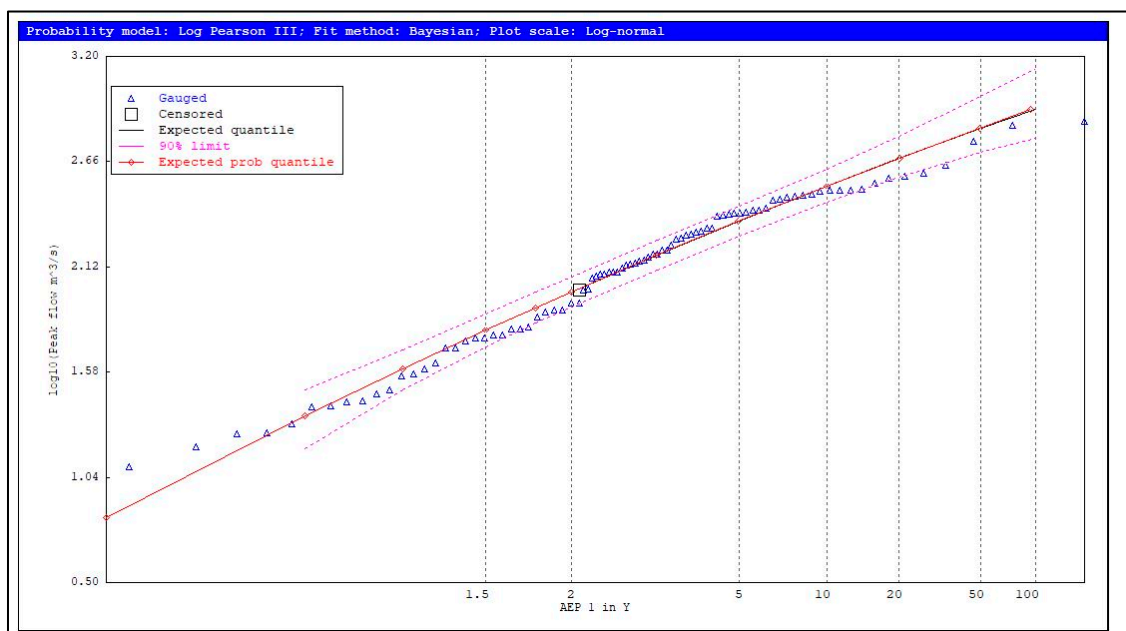

Figure S1. Fitting of the LP3 distribution for station 215004 (no censoring)

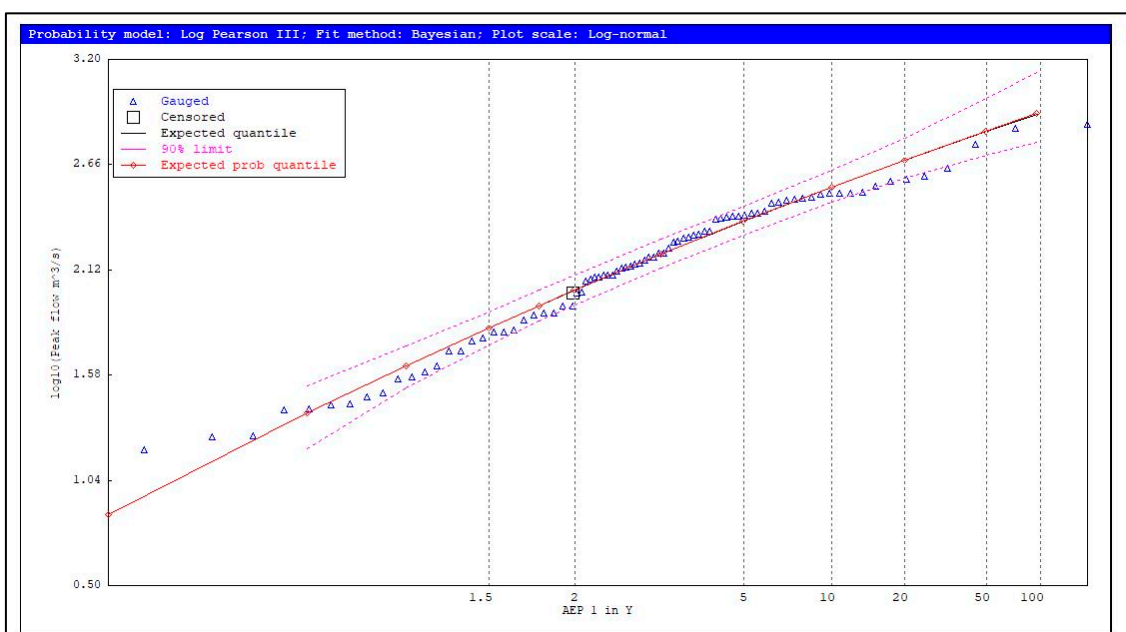

Figure S2. Fitting of the LP3 distribution for station 215004 (five PILFs are censored)

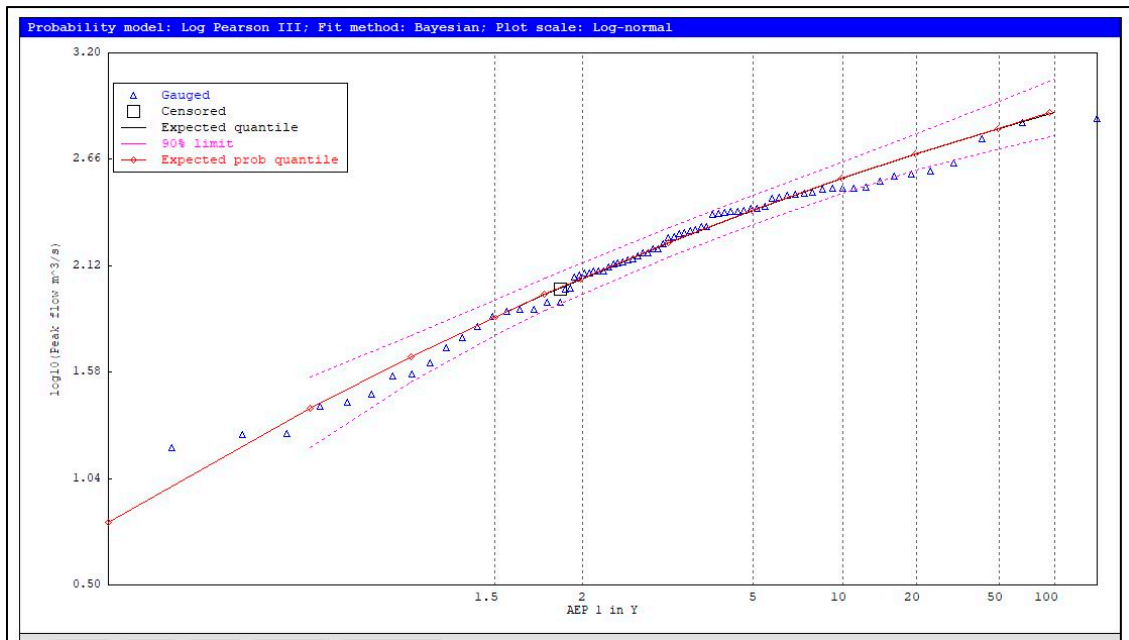

**Figure S3.** Fitting of the LP3 distribution for station 215004 (13 PILFs are censored)

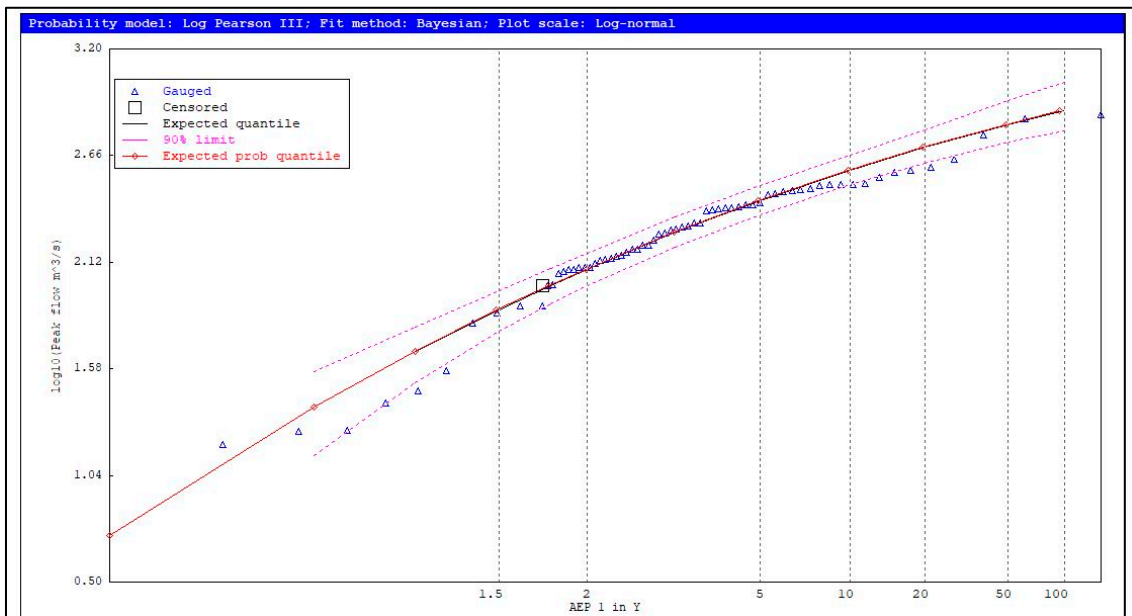

**Figure S4.** Fitting of the LP3 distribution for station 215004 (21 PILFs are censored)

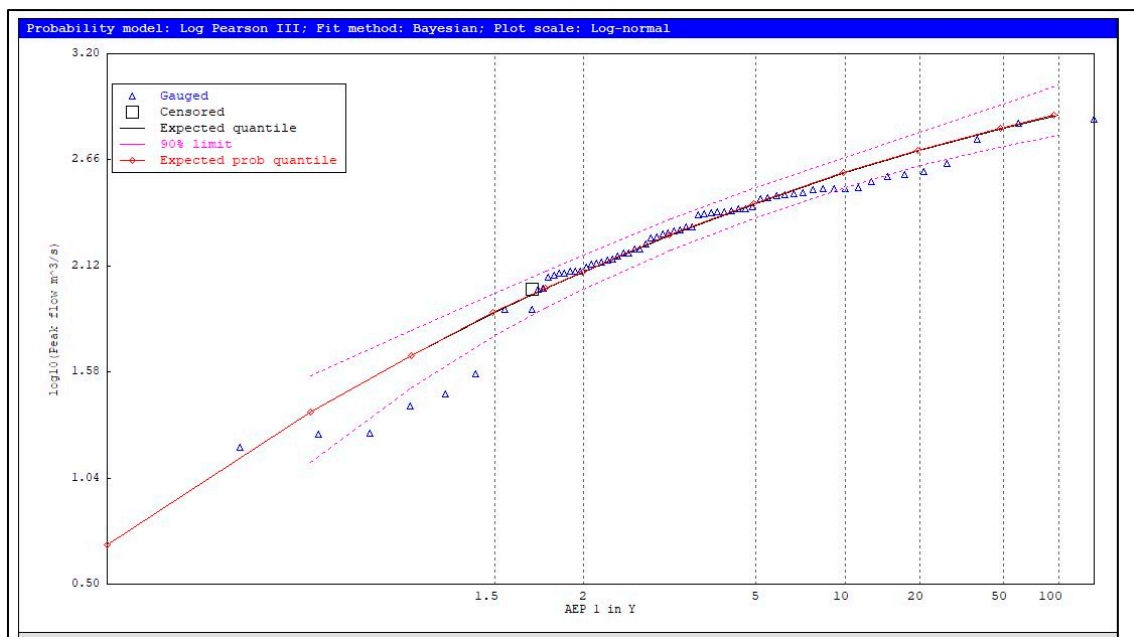

**Figure S5.** Fitting of the LP3 distribution for station 215004 (23 PILFs are censored)

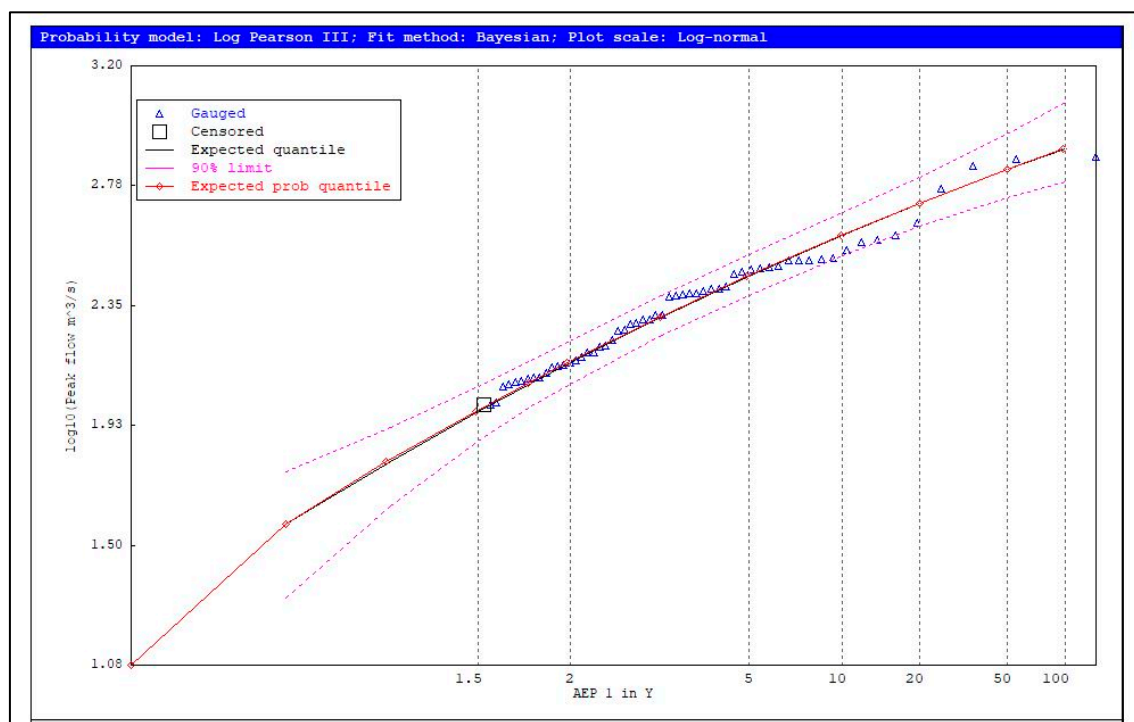

**Figure S6.** Fitting of the LP3 distribution for station 215004 (31 PILFs are censored)
